# Supplementary material for: Aromatic Residues on the Side Surface of Cry4Ba-Domain II of Bacillus thuringiensis subsp. israelensis Function in Binding to Their Counterpart Residues on the Aedes aegypti Alkaline Phosphatase Receptor
Source: MDPI journal article supplement (doi:10.3390/toxins15020114), 2023-01-29
Supplement: s1 [file s1]

**Supplementary Table S1.** Mutagenized primers for alanine substitution of selected amino acid residues on domains II and III of Cry4Ba toxin and Aa-mALP receptor.

| Protein           | Primer  | Sequence (5' ==> 3')                | Restriction site |
|-------------------|---------|-------------------------------------|------------------|
| Cry4Ba domain II  | W327A-f | GAGTAGACTTCGCGACCAATACTATATA        | AccI             |
|                   | W327A-r | ATTGGTTCGCGAAGTCTACTCTCTTTAG        |                  |
|                   | Y347A-f | TGGGTTCTCAGCTACAAATTCTTCTGCA        | DdeI             |
|                   | Y347A-r | AATTTGTAGCTGAGAACCCAATTTTATTGG      |                  |
|                   | I358A-f | AAGTGGAGCATATGGAAGTTCTGG            | NdeI             |
|                   | I358A-r | TTCCATATGCTCCACTTTCTTGTCAT          |                  |
|                   | Y359A-f | TGGAATTGCTGGATCCTCTGGTTTTGGTTC      | BamHI            |
|                   | Y359A-r | ACCAGAGGATCCAGCAATCCACTTTCTTG       |                  |
| Cry4Ba domain III | F490A-f | AATCTAACGCTTTAAATGCAACAGCTAAA       | DraI             |
|                   | F490A-r | TTGCATTTAAAGCGTTAGATTTTACGGCC       |                  |
|                   | L517A-f | TGGTACCGCATCAGGCAGAATGG             | KpnI             |
|                   | L517A-r | CCTGATGCGGTACCATTGCTTGTA            |                  |
| Aa-mALP           | L52A-f  | GCACGATGCCTTATTTCGAAAAAAGGATTATACGA | BstBI            |
|                   | L52A-r  | TCCTTTTTTTCGAATAAAGGCATCGTGCGCCTG   |                  |
|                   | L53A-f  | GATCTCGCATTCGAAAAAAGGATTATACGA      | BstBI            |
|                   | L53A-r  | CCTTTTTTTCGAATGCGAGATCGTGCGC        |                  |
|                   | S490A-f | TCATGTTTGCCGGTGGCTACGAGCAAACTTC     | BciVI            |
|                   | S490A-r | CTCGTAGCCACCGGCAAACATGAACGCCC       |                  |
|                   | F497A-f | GCAAAACGCGATCGCCCATGCCATC           | Bsp143I          |
|                   | F497A-r | ATGGGCGATCGCGTTTTGCTCGTATC          |                  |
|                   | H500A-f | TCATTGCTGCAGCCATCTCGTTTG            | PstI             |
|                   | H500A-r | GATGGCTGCAGCAATGAAGTTTTGC           |                  |
|                   | G513A-f | TGTGTGCAGGAGCTCACCACCACCAC          | SacI             |
|                   | G513A-r | GTGGTGAGCTCCTGCACACACGTCCG          |                  |

Bold letters indicate mutated nucleotide residues; f and r represent forward and reverse primers, respectively. Underlined and double underlined bases represent the recognition sites introduced and eliminated for restriction analysis, respectively.
