# Supplementary material for: Aromatic Residues on the Side Surface of Cry4Ba-Domain II of Bacillus thuringiensis subsp. israelensis Function in Binding to Their Counterpart Residues on the Aedes aegypti Alkaline Phosphatase Receptor
Source: MDPI journal article supplement (doi:10.3390/toxins15020114), 2023-01-29
Supplement: s1 [file s1]

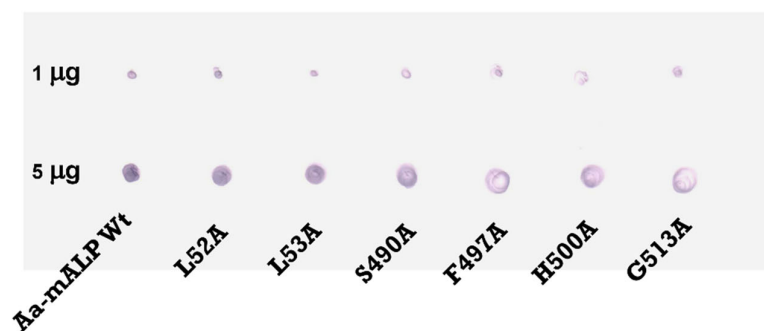

**Supplementary Figure S1** Alkaline phosphatase activities of purified Aa-mALP wild-type and its mutants.
